# Supplementary material for: Changes in zooplankton community, and seston and zooplankton fatty acid profiles at the freshwater/saltwater interface of the Chowan River, North Carolina
Source: PeerJ. 2017 Aug 16;5:e3667. doi: 10.7717/peerj.3667 (PMC5563156; doi:10.7717/peerj.3667)
Supplement: Supplemental Information 1 [file peerj-05-3667-s001.xlsx]

## Sheet: June
JuneFA Data
	6JuneC	5JuneC	4JuneC	3JuneC	2JuneC	1JuneC	7JuneR	6JuneR	5JuneR	4JuneR	3JuneR	2JuneR	1JuneR	7JuneL	6JuneL	5JuneL	4JuneL	3JuneL	2JuneL
C12:0	0.111424	0.256497	0.177315	0.212137	0.512774	0.512722	0.289217	0.252626	0.20737	0.307016	0.204922	0.64813	0.93355	0.138004	0.103137	0.135706	0.237232	0.155677	0.196542
C14:0	4.94615	5.68305	4.64102	4.13214	5.49088	4.96151	5.5414	5.94874	5.0504	6.49567	4.34796	7.0988	7.57685	5.96892	5.28323	5.29968	4.937	5.15899	4.62706
C15:0	0.925745	1.00759	1.05252	0.911211	1.25457	1.66908	1.1016	1.08476	0.926521	1.29857	0.717392	1.44237	1.57402	1.00746	1.18168	1.09538	1.30406	1.03984	1.0705
C16:0	20.1979	21.9845	20.8684	21.7937	27.3136	26.2847	21.8712	21.4656	19.7324	23.5269	21.7527	27.8088	29.5466	22.5279	19.2735	19.7806	19.2762	19.9044	20.1843
C16:1n-9	0.786947	1.22789	0.806955	0.738253	0.89632	0.929189	1.15986	0.871382	0.538653	0.673285	0.465725	1.55271	1.9465	1.29125	0.889076	0.916956	0.848123	0.316693	0.404109
C16:1n-7	9.29884	7.75753	7.29539	7.92545	11.2419	12.1384	6.27656	6.17708	5.6892	6.14142	4.44684	10.0326	9.96165	9.81618	7.02973	6.60648	5.80887	4.05869	4.48066
C17:0	1.31822	1.54146	1.75969	1.23463	1.87638	1.83235	1.48688	1.29094	1.08904	1.3226	0.930343	1.3246	1.57861	1.15714	1.87677	1.60795	2.10552	1.66659	1.92769
C18:0	6.68676	7.11627	7.73989	7.34774	9.23929	7.96704	6.98804	6.79935	7.26319	7.05394	7.23022	6.6883	7.7964	7.24684	7.13832	7.49918	7.93944	7.47592	7.56667
C18:1n-9	5.97665	4.16584	3.31959	10.2156	7.81252	5.5213	3.34709	2.91521	8.3968	2.00428	7.85197	3.69275	3.97155	5.98127	8.89573	10.1691	10.8138	11.7161	13.8257
C18:1n-7	3.98042	3.03971	4.07722	4.60307	4.87856	5.72589	2.61685	2.91451	3.4944	3.01304	3.40733	4.11132	3.95845	2.18749	3.33091	3.25462	4.22906	3.1946	3.63006
C18:2n-6	2.47107	2.36206	2.14028	3.0414	2.16381	2.21866	2.27858	2.22294	2.94357	1.56397	2.96085	2.14276	2.74803	2.93567	2.82798	2.75251	3.03007	2.80425	2.66161
C18:3n-3	5.70828	6.58974	6.88759	9.57401	6.19146	5.94371	6.2426	7.31017	6.55904	8.00668	9.58015	7.68341	6.48598	5.01668	6.15782	6.75789	6.60632	10.2957	8.96606
C18:4n-3	2.09094	2.46175	2.46486	3.71797	1.52835	2.10894	2.77566	3.08365	2.67332	3.10138	4.04373	2.747	2.211	2.36689	2.14257	2.56328	1.72312	3.31291	2.16852
C20:0	0.0678527	0.126193	0.107295	0.116962	0.194588	0.19601	0.245823	0.197412	0.165733	0.156587	0.181775	0.32005	0.442897	0.170548	0.0801972	0.11267	0.0914513	0.0772675	0.0763434
C20:1	0.235289	0.323756	0.126812	0.214838	0.0312516	0.0596802	1.45695	2.18645	2.18428	1.13303	1.72167	0.895528	0.492026	0.0932305	0.284964	0.434222	0.105059	0.305749	0.0483147
C20:2n-6	0.152585	0.176466	0.147024	0.184371	0.0964039	0.114231	0.277091	0.253568	0.357432	0.127061	0.259753	0.147598	0.244058	0.128123	0.107859	0.143221	0.0654615	0.0922699	0.064528
C20:3n-6	0.0777475	0.131613	0.0781219	0.0936152	0.0730583	0.0764098	0.196922	0.272881	0.244115	0.173431	0.172579	0.0724818	0.248496	0.089248	0.137067	0.136255	0.0594198	0.0850379	0.0648687
C20:4n-6	3.37379	3.10856	3.63766	4.79961	4.85029	6.05934	2.20149	2.88172	3.93321	3.19809	3.21991	3.2534	3.56901	3.23244	5.15666	5.34382	6.80238	6.17754	7.14624
C20:3n-3	0.186814	0.25778	0.261302	0.316533	0.0546385	0.121374	0.326258	0.268048	0.44557	0.216572	0.632374	0.271191	0.242474	0.0667361	0.173788	0.186983	0.14358	0.269776	0.172756
C20:4n-3	0.878017	1.14038	0.831995	0.902159	0.261313	0.476962	2.40518	2.1376	2.36734	2.20121	2.02163	2.34398	1.51929	2.77977	1.65744	1.50142	1.15486	1.80311	1.61458
C20:5n-3	16.8973	15.8504	15.5214	10.2288	9.88651	10.029	12.8173	11.406	8.90119	12.1191	8.48901	8.88404	7.2545	20.5121	19.8325	17.1858	18.1766	16.9892	17.9349
C22:5n-6	2.23888	2.28241	2.54176	0.675354	0.457639	0.418288	3.2582	3.31118	2.58506	2.89363	2.36769	1.47232	0.869894	0.653263	1.09567	0.905221	0.729386	0.589295	0.257663
C22:5n-3	0.968123	0.937385	0.607586	0.573489	0.0827029	0.229853	2.37893	2.856	3.13639	1.56291	2.16446	0.454944	0.246171	0.182778	0.751611	0.763637	0.285933	0.454061	0.107547
C22:6n-3	10.4243	10.4712	12.9083	6.44705	3.61115	4.40536	12.4603	11.8921	11.1157	11.7096	10.829	4.911	4.58201	4.45004	4.59181	4.84742	3.52707	2.05631	0.802674
SFA	34.254	37.7155	36.3462	35.7485	45.8821	43.4234	37.5242	37.0395	34.4347	40.1612	35.3654	45.331	49.4489	38.2168	34.9368	35.5312	35.8909	35.4786	35.6491
MUFA	20.2781	16.5147	15.626	23.6972	24.8606	24.3744	14.8573	15.0646	20.3033	12.965	17.8935	20.2849	20.3302	19.3694	20.4304	21.3813	21.8049	19.5919	22.3889
PUFA	45.4678	45.7698	48.0279	40.5543	29.2573	32.2022	47.6185	47.8959	45.262	46.8737	46.7411	34.3841	30.2209	42.4138	44.6328	43.0875	42.3042	44.9295	41.962
n-3	37.1538	37.7087	39.483	31.76	21.6161	23.3152	39.4062	38.9536	35.1986	38.9175	37.7603	27.2956	22.5414	35.375	35.3076	33.8065	31.6175	35.1811	31.7671
n-6	8.31406	8.06111	8.54484	8.79434	7.6412	8.88693	8.21227	8.94229	10.0634	7.95618	8.98077	7.08856	7.67949	7.03875	9.32523	9.28102	10.6867	9.74839	10.1949
n-3/n-6	4.46878	4.67785	4.62069	3.61141	2.82889	2.62354	4.79845	4.35611	3.49769	4.89148	4.20458	3.85065	2.93528	5.02576	3.78624	3.64254	2.95858	3.60891	3.11597
DHA/EPA	0.616921	0.660628	0.831646	0.630286	0.36526	0.43926	0.97215	1.04262	1.24879	0.966212	1.27565	0.55279	0.631609	0.216946	0.231529	0.282059	0.194044	0.121036	0.0447548
EPA/DHA	1.62095	1.51371	1.20243	1.58658	2.73777	2.27656	1.02865	0.959122	0.800773	1.03497	0.783916	1.80901	1.58326	4.60943	4.31912	3.54536	5.15346	8.26199	22.344

## Sheet: Fatty Acid Data
April FA Data
	1	2	3	4	5	6	7	8	9	10	11	12	13	14	16	17	18	20	21	22	23	24	25	26	27	28	29	30	31	32	33	34	35	36	37	38	39	40	41	45	46	47	48	49	50	51	53	54	55
C14:0	4.53538	5.88692	6.08776	5.9878	3.67096	4.39219	5.82159	4.40703	3.28766	2.94824	2.34327	3.08092	2.33652	2.12549	3.6715	6.61333	6.6429	5.30426	4.94615	5.68305	4.64102	4.13214	5.49088	4.96151	5.5414	5.94874	5.0504	6.49567	4.34796	7.0988	7.57685	5.96892	5.28323	5.29968	4.937	5.15899	4.62706	4.74749	8.4911	6.49851	4.82042	7.54553	6.8807	8.23183	4.27274	7.05116	10.5114	20.0439	8.49456
C15:0	1.09605	0.806895	0.702865	0.676835	0.677905	0.631827	0.659995	0.591076	0.388815	0.297951	0.216663	0.303582	0.328024	0.217925	0.749762	0.884241	0.800254	0.919064	0.925745	1.00759	1.05252	0.911211	1.25457	1.66908	1.1016	1.08476	0.926521	1.29857	0.717392	1.44237	1.57402	1.00746	1.18168	1.09538	1.30406	1.03984	1.0705	0.689076	2.02664	1.60341	0.599987	0.721158	1.70142	1.68968	1.62554	1.35058	1.66767	1.12414	2.02765
C16:0	29.6868	24.9181	19.0088	18.8373	17.8767	20.9483	20.7799	24.3357	22.7192	26.4275	28.2647	24.7427	29.6539	30.1312	23.8242	23.2776	21.5968	22.504	20.1979	21.9845	20.8684	21.7937	27.3136	26.2847	21.8712	21.4656	19.7324	23.5269	21.7527	27.8088	29.5466	22.5279	19.2735	19.7806	19.2762	19.9044	20.1843	33.1023	39.8669	55.8162	51.1461	45.2502	46.2184	45.0676	48.7589	50.4048	49.1285	47.9438	51.849
C16:1n-9	0.293083	0.849982	1.11391	1.09692	0.299337	0.789299	1.28351	0.613068	0.305038	0.385548	0.412181	1.02546	0.274007	0.155937	0.0627775	0.866245	1.26042	0.176556	0.786947	1.22789	0.806955	0.738253	0.89632	0.929189	1.15986	0.871382	0.538653	0.673285	0.465725	1.55271	1.9465	1.29125	0.889076	0.916956	0.848123	0.316693	0.404109	0.283103	0.140019	2.41815	0.977371	0.809792	0.927135	1.76211	3.54759	0.736779	1.71209	1.02191	1.58126
C16:1n-7	4.06693	6.99168	8.67034	7.31781	2.88622	5.29119	6.67825	1.46149	4.97396	1.74076	1.48447	1.28465	1.40844	1.39691	6.401	12.046	9.37137	8.05967	9.29884	7.75753	7.29539	7.92545	11.2419	12.1384	6.27656	6.17708	5.6892	6.14142	4.44684	10.0326	9.96165	9.81618	7.02973	6.60648	5.80887	4.05869	4.48066	2.43249	2.52074	0.394033	0.251473	2.80928	2.85922	1.67989	1.64232	1.35948	10.8658	8.42521	4.78109
C17:0	1.27596	1.04124	0.968252	1.05121	1.16503	1.0516	0.899309	0.633401	0.450512	0.449952	0.388085	0.649939	0.330386	0.353544	1.16907	0.975897	0.976681	0.776273	1.31822	1.54146	1.75969	1.23463	1.87638	1.83235	1.48688	1.29094	1.08904	1.3226	0.930343	1.3246	1.57861	1.15714	1.87677	1.60795	2.10552	1.66659	1.92769	1.67915	1.85577	2.37026	2.11961	2.31597	2.62883	2.75094	2.83815	2.73844	2.00806	1.95547	2.39968
C18:0	11.205	7.8132	5.03527	5.02781	5.50366	5.19174	4.69566	3.37708	4.75399	3.20953	2.97541	3.44313	2.99287	2.98739	6.21508	6.07102	5.96142	6.94192	6.68676	7.11627	7.73989	7.34774	9.23929	7.96704	6.98804	6.79935	7.26319	7.05394	7.23022	6.6883	7.7964	7.24684	7.13832	7.49918	7.93944	7.47592	7.56667	17.0567	10.1338	9.98782	12.9423	18.5255	19.807	13.7218	21.7411	13.2353	11.6214	8.75026	8.70418
C18:1n-9	17.0072	12.7666	7.13292	7.16592	4.32573	7.09684	6.37971	13.7884	27.3439	28.191	27.9126	13.1242	38.0453	36.6451	2.29044	4.24439	16.597	10.5036	5.97665	4.16584	3.31959	10.2156	7.81252	5.5213	3.34709	2.91521	8.3968	2.00428	7.85197	3.69275	3.97155	5.98127	8.89573	10.1691	10.8138	11.7161	13.8257	10.0704	5.64603	2.31812	7.20298	7.44122	4.47143	2.27647	5.75769	2.91039	3.31049	1.87162	2.16672
C18:1n-7	2.14456	1.91868	2.11227	2.23448	2.17683	2.73478	2.8718	0.673484	1.98421	0.825017	0.695288	1.00815	0	0	1.92323	1.85132	2.33316	2.86887	3.98042	3.03971	4.07722	4.60307	4.87856	5.72589	2.61685	2.91451	3.4944	3.01304	3.40733	4.11132	3.95845	2.18749	3.33091	3.25462	4.22906	3.1946	3.63006	1.24002	1.00727	0	0.246951	0.764729	0.127287	0.018195	0.479161	0	0.483089	0.017091	0.273314
C18:2n-6	4.16781	3.51072	4.31077	5.08916	5.0296	4.82794	5.99907	7.57486	12.2207	11.2455	10.3665	6.2812	12.2888	14.6475	1.14593	3.05381	4.19745	5.4617	2.47107	2.36206	2.14028	3.0414	2.16381	2.21866	2.27858	2.22294	2.94357	1.56397	2.96085	2.14276	2.74803	2.93567	2.82798	2.75251	3.03007	2.80425	2.66161	1.90857	1.90303	2.61638	1.89596	2.08275	0.547777	0.167254	1.27722	0.026711	0.510372	0.120604	0.202004
C18:3n-3	2.91348	4.66338	8.87581	9.23813	11.6407	11.2704	12.2444	7.53881	2.27114	3.93952	4.5216	9.32652	1.98924	1.56265	3.15348	3.05278	4.30439	3.8412	5.70828	6.58974	6.88759	9.57401	6.19146	5.94371	6.2426	7.31017	6.55904	8.00668	9.58015	7.68341	6.48598	5.01668	6.15782	6.75789	6.60632	10.2957	8.96606	1.75979	1.54896	2.30539	5.21659	1.53334	1.91903	3.18587	0.419243	2.61713	1.25529	1.29214	5.21048
C18:4n-3	1.37431	1.98057	6.15996	7.40087	9.0589	6.2898	6.36492	9.21921	1.52964	4.82316	6.25404	11.3587	1.92283	1.19809	1.55413	2.31586	2.46842	1.69782	2.09094	2.46175	2.46486	3.71797	1.52835	2.10894	2.77566	3.08365	2.67332	3.10138	4.04373	2.747	2.211	2.36689	2.14257	2.56328	1.72312	3.31291	2.16852	0.187463	0.386543	0.837168	2.96689	1.06928	1.40377	2.47522	0.028515	0.171952	0.238688	0.0161236	3.24779
C20:0	0.390558	0.192717	0.192318	0.318897	0.0915446	0.172236	0.208211	0.727538	1.66429	1.51596	1.48196	0.844058	2.30442	2.06849	0.0897473	0.210138	0.173278	0.131282	0.0678527	0.126193	0.107295	0.116962	0.194588	0.19601	0.245823	0.197412	0.165733	0.156587	0.181775	0.32005	0.442897	0.170548	0.0801972	0.11267	0.0914513	0.0772675	0.0763434	0.175755	0.381811	0.157613	0.185735	0.790543	0.687292	0.609182	0.890282	0.424038	0.354532	0.257655	0.48623
C20:1	0.313691	0.157762	0.21622	0.363491	0.384784	0.191465	0.124824	0.607287	0.758613	0.620332	0.615571	0.94632	0.607922	0.298208	0.0898839	0.148996	0.066521	1.05444	0.235289	0.323756	0.126812	0.214838	0.0312516	0.0596802	1.45695	2.18645	2.18428	1.13303	1.72167	0.895528	0.492026	0.0932305	0.284964	0.434222	0.105059	0.305749	0.0483147	0.0240085	0.263805	0.11821	0.0879982	0.166226	0.0964376	0.188948	0.0951102	0.121869	0.119844	0.0715887	0.284988
C20:2n-6	0.224342	0.342276	0.263129	0.303884	0.368211	0.34168	0.482177	0.480728	0.526327	0.487632	0.455694	0.587419	0.418193	0.32464	0.199691	0.163721	0.0881237	0.333703	0.152585	0.176466	0.147024	0.184371	0.0964039	0.114231	0.277091	0.253568	0.357432	0.127061	0.259753	0.147598	0.244058	0.128123	0.107859	0.143221	0.0654615	0.0922699	0.064528	0.0722885	0.285609	0.514061	0.42573	0.953487	0.842092	0.576291	1.08122	1.39676	0.45752	0.19187	0.320009
C20:3n-6	0.100989	0.134542	0.0293543	0.0483024	0.0259989	0.09059	0.0626606	0.093916	0.178407	0.0957178	0.0289151	0.029737	0.118344	0.140429	0.0257245	0.0647601	0.0220724	0.239152	0.0777475	0.131613	0.0781219	0.0936152	0.0730583	0.0764098	0.196922	0.272881	0.244115	0.173431	0.172579	0.0724818	0.248496	0.089248	0.137067	0.136255	0.0594198	0.0850379	0.0648687	0.0581465	0.0428594	0.181861	0.505033	0.651922	0.523598	0.485666	0.298144	0.158597	0.160696	0.550781	0.342594
C20:4n-6	3.69164	2.66555	1.67585	1.73669	1.5748	2.50827	2.91876	0.355193	1.72341	0.555545	0.201984	0.496151	0.262281	0.200753	1.07089	1.52591	2.75072	3.51174	3.37379	3.10856	3.63766	4.79961	4.85029	6.05934	2.20149	2.88172	3.93321	3.19809	3.21991	3.2534	3.56901	3.23244	5.15666	5.34382	6.80238	6.17754	7.14624	1.45301	1.09179	0.664399	0.427817	1.18059	1.73477	0.247732	0.476995	1.3528	1.17873	1.11285	0.733913
C20:3n-3	0.167497	0.354617	0.401377	0.487007	0.856352	0.362723	0.119331	0.87465	0.27057	0.44831	0.441036	1.1091	0.224685	0.194146	0.158098	0.0609459	0.0688415	0.377737	0.186814	0.25778	0.261302	0.316533	0.0546385	0.121374	0.326258	0.268048	0.44557	0.216572	0.632374	0.271191	0.242474	0.0667361	0.173788	0.186983	0.14358	0.269776	0.172756	0.0980072	0.132921	1.41609	0.372166	0.439589	0.636433	0.804078	0.690316	1.71006	0.507801	0.19832	0.273822
C20:4n-3	0.802493	0.935408	1.01516	1.23302	1.91177	1.29254	0.345726	2.72805	1.25595	1.84469	1.53573	2.92283	0.790343	1.26912	0.259523	0.919494	0.541132	1.68729	0.878017	1.14038	0.831995	0.902159	0.261313	0.476962	2.40518	2.1376	2.36734	2.20121	2.02163	2.34398	1.51929	2.77977	1.65744	1.50142	1.15486	1.80311	1.61458	1.03151	0.156941	0.709865	0.766593	0.776965	0.844594	3.46859	0.360047	4.4051	0.337677	0.107383	0.654482
C20:5n-3	5.85263	10.5693	14.9241	13.8628	14.4686	12.9888	12.9565	12.7004	6.16679	6.78672	6.56488	10.7298	2.82296	2.8706	16.574	16.2535	15.5093	9.311	16.8973	15.8504	15.5214	10.2288	9.88651	10.029	12.8173	11.406	8.90119	12.1191	8.48901	8.88404	7.2545	20.5121	19.8325	17.1858	18.1766	16.9892	17.9349	9.09303	6.11496	1.33122	2.281	1.20506	2.07049	4.66561	0.0505329	0.935443	1.29928	1.0806	2.82323
C22:5n-6	0.392535	0.17474	0.57771	0.709815	0.781919	0.703283	1.05839	0.999272	0.294909	0.389912	0.338086	1.07661	0.0341223	0.0118222	1.0641	0.844551	0.427124	1.41397	2.23888	2.28241	2.54176	0.675354	0.457639	0.418288	3.2582	3.31118	2.58506	2.89363	2.36769	1.47232	0.869894	0.653263	1.09567	0.905221	0.729386	0.589295	0.257663	0.462936	0.218071	0.885664	1.58536	0.565079	0.328221	1.76666	0.560916	1.52197	0.110559	0.441141	0.435476
C22:5n-3	0.440668	0.43908	0.385599	0.459006	0.673839	0.393025	0.178442	0.259313	0.558901	0.0503896	0.0770668	0.155872	0.203317	0.0919259	0.299795	0.34368	0.12039	2.10536	0.968123	0.937385	0.607586	0.573489	0.0827029	0.229853	2.37893	2.856	3.13639	1.56291	2.16446	0.454944	0.246171	0.182778	0.751611	0.763637	0.285933	0.454061	0.107547	0.333093	0.102012	1.30031	0.689725	0.313203	0.570844	1.42726	0.520309	1.75514	0.238688	0.564003	0.208094
C22:6n-3	7.31651	10.4638	9.98432	9.19576	14.3941	10.2625	6.68847	5.74141	4.22645	2.61423	2.37582	5.38329	0.512446	0.910763	27.9372	13.9809	3.42908	10.5226	10.4243	10.4712	12.9083	6.44705	3.61115	4.40536	12.4603	11.8921	11.1157	11.7096	10.829	4.911	4.58201	4.45004	4.59181	4.84742	3.52707	2.05631	0.802674	11.6986	13.3001	2.99465	0.880677	1.30176	0.38714	1.93182	1.20864	2.05619	0.234688	0.621725	0.495874
SFA	48.1897	40.6591	31.9953	31.8998	28.9858	32.3879	33.0647	34.0718	33.2645	34.8492	35.6701	33.0643	37.9461	37.884	35.7194	38.0322	36.1513	36.5768	34.1426	37.459	36.1689	35.5364	45.3693	42.9107	37.235	36.7868	34.2273	39.8542	35.1604	44.6829	48.5154	38.0788	34.8336	35.3955	35.6537	35.323	35.4526	57.4505	62.756	76.4338	71.8142	75.1489	77.9236	72.071	80.1267	75.2044	75.2916	80.0751	73.9613
MUFA	23.8255	22.6847	19.2457	18.1786	10.0729	16.1036	17.3381	17.1438	35.3657	31.7627	31.1201	17.3888	40.3357	38.4962	10.7673	19.1569	29.6285	22.6631	20.2781	16.5147	15.626	23.6972	24.8606	24.3744	14.8573	15.0646	20.3033	12.965	17.8935	20.2849	20.3302	19.3694	20.4304	21.3813	21.8049	19.5919	22.3889	14.05	9.57786	5.24851	8.76677	11.9913	8.48151	5.92562	11.5219	5.12852	16.4913	11.4074	9.08738
PUFA	27.4449	36.234	48.6031	49.7645	60.7848	51.3315	49.4189	48.5658	31.2232	33.2813	33.1613	49.4572	21.5876	23.4225	53.4426	42.58	33.9271	40.5032	45.4678	45.7698	48.0279	40.5543	29.2573	32.2022	47.6185	47.8959	45.262	46.8737	46.7411	34.3841	30.2209	42.4138	44.6328	43.0875	42.3042	44.9295	41.962	28.1564	25.2838	15.7571	18.0135	12.073	11.8087	21.2021	6.9721	18.1079	6.52999	6.29754	14.9478
n-3	18.8676	29.4062	41.7463	41.8766	53.0043	42.8597	38.8978	39.0619	16.2794	20.507	21.7702	40.9861	8.46581	8.0973	49.9362	36.9272	26.4416	29.543	37.1538	37.7087	39.483	31.76	21.6161	23.3152	39.4062	38.9536	35.1986	38.9175	37.7603	27.2956	22.5414	35.375	35.3076	33.8065	31.6175	35.1811	31.7671	24.2015	21.7424	10.8947	13.1736	6.63919	7.83229	17.9585	3.2776	13.651	4.11211	3.8803	12.9138
n-6	8.57731	6.82782	6.85682	7.88785	7.78053	8.47177	10.521	9.50397	14.9438	12.7743	11.3912	8.47112	13.1218	15.3252	3.50634	5.65276	7.48549	10.9603	8.31406	8.06111	8.54484	8.79434	7.6412	8.88693	8.21227	8.94229	10.0634	7.95618	8.98077	7.08856	7.67949	7.03875	9.32523	9.28102	10.6867	9.74839	10.1949	3.95495	3.54136	4.86236	4.8399	5.43383	3.97645	3.24361	3.6945	4.45685	2.41787	2.41725	2.034
n-3/n-6	2.19971	4.30682	6.08829	5.309	6.81243	5.05912	3.69714	4.11006	1.08938	1.60533	1.91115	4.83833	0.645172	0.528365	14.2417	6.5326	3.53238	2.69547	4.46878	4.67785	4.62069	3.61141	2.82889	2.62354	4.79845	4.35611	3.49769	4.89148	4.20458	3.85065	2.93528	5.02576	3.78624	3.64254	2.95858	3.60891	3.11597	6.11928	6.13956	2.24062	2.72188	1.22183	1.96967	5.53657	0.887157	3.06293	1.70071	1.60526	6.34897
DHA/EPA	1.25012	0.990018	0.669008	0.663341	0.994847	0.790105	0.516226	0.452064	0.685357	0.385198	0.361898	0.501716	0.181528	0.317272	1.68561	0.860176	0.221098	1.13012	0.616921	0.660628	0.831646	0.630286	0.36526	0.43926	0.97215	1.04262	1.24879	0.966212	1.27565	0.55279	0.631609	0.216946	0.231529	0.282059	0.194044	0.121036	0.0447548	1.28654	2.175	2.24954	0.386093	1.08024	0.18698	0.414054	23.9179	2.1981	0.180629	0.575351	0.17564
Mesh size	200	200	200	200	200	200	200	60	60	60	60	60	60	60	200	200	200	60	200	200	200	200	200	200	60	60	60	60	60	60	60	Lep	Lep	Lep	Lep	Lep	Lep	Cten	Cten	Phytoplankton	Phytoplankton	Phytoplankton	Phytoplankton	Phytoplankton	Phytoplankton	Phytoplankton	Phytoplankton	Phytoplankton	Phytoplankton
Month	April	April	April	April	April	April	April	April	April	April	April	April	April	April	May	May	May	May	June	June	June	June	June	June	June	June	June	June	June	June	June	June	June	June	June	June	June	May	May	April	April	April	April	April	April	April	May	May	May
type	Zooplankton	Zooplankton	Zooplankton	Zooplankton	Zooplankton	Zooplankton	Zooplankton	Zooplankton	Zooplankton	Zooplankton	Zooplankton	Zooplankton	Zooplankton	Zooplankton	Zooplankton	Zooplankton	Zooplankton	Zooplankton	Zooplankton	Zooplankton	Zooplankton	Zooplankton	Zooplankton	Zooplankton	Zooplankton	Zooplankton	Zooplankton	Zooplankton	Zooplankton	Zooplankton	Zooplankton	Predator	Predator	Predator	Predator	Predator	Predator	Predator	Predator	Phytoplankton	Phytoplankton	Phytoplankton	Phytoplankton	Phytoplankton	Phytoplankton	Phytoplankton	Phytoplankton	Phytoplankton	Phytoplankton
Site	7	6	5	4	3	2	1	7	6	5	4	3	2	1	7	4	1	4	6	5	4	3	2	1	7	6	5	4	3	2	1	7	6	5	4	3	2	7	7	7	6	5	4	3	2	1	7	4	1
[truncated: 7 more columns]

## Sheet: ZP Composition Data
ZP Counts
	3	4	5	6	7	8	9	13	14	15	16	17	18	19	20	21	22	23	24	25	26	29	30	31	32	33	34	35	39	40	41	42	43	44	45	46	47	48	49	50	51	52
Bosminidae	23.9186	25.9939	29.8913	55.4273	13.3457	28.9894	11.0204	12.9098	11.7103	24.1237	22.0588	15.5172	15.3846	19.75	11.7	9.8	7.56303	10.1587	46.729	39.4089	44.5887	0	0	0	0	0	0	0	0	0	0	0	0	0	0	0	0	0	0	0	0	0
Leptodora spp.	0.508906	0.611621	0	0	0	0	0	0.204918	0.154083	0.206186	0.735294	2.58621	1.3986	31.25	10.3789	42.7918	33.7815	33.0159	28.6604	14.2857	4.7619	0	0	0	0	0	0	0	0	0	0	0	0	0	0	0.170678	0.110416	1.03806	0.196078	0.463744	0.147493	0
Calanoida	8.90585	9.78593	25	11.0855	3.05839	14.3617	43.2653	0	0	0	0	0	48.951	29.5	44.1516	7.43707	4.53782	4.7619	1.86916	2.95567	15.1515	0.0282167	0.102534	0.143678	0.0364964	0.398558	0.214592	0.592885	0.826446	0.300601	0.371747	0.338066	0.138889	0	0.224719	1.07527	0.993743	4.06574	0.666667	1.34907	0.589971	1.2945
Cyclopoida	64.1221	56.5749	38.0435	20.3233	75.9036	36.4362	13.0612	0	0.616333	0.412371	0.735294	0.862069	0	3.5	3.29489	8.81007	23.3613	11.4286	1.24611	2.46305	4.7619	0.366817	0.454079	1.00575	0.583942	3.28336	0.697425	2.96443	0.247934	0.1002	0	0	0.416667	0	0.224719	0.614439	1.04895	5.88235	1.4902	1.55987	1.47493	2.6699
Copepod nauplii	0	0	0	0	0	0	0	0	0	0	0	0	0	0	0.988468	0.228833	0.840336	0	0.934579	0.985222	0	4.00677	2.66589	16.092	3.43066	8.35073	3.37983	9.48617	23.1405	20.8417	12.2057	10.6153	17.7778	8.4121	7.86517	51.5617	11.7409	31.6609	9.68627	13.7858	9.14454	8.73786
Rotifers	0	0.30581	0	0	0	0	0	0	0	0	2.94118	0.862069	0	0.5	11.3674	9.15332	8.90756	31.1111	0.623053	27.0936	2.5974	95.316	96.675	81.4655	95.6934	87.4549	95.1717	83.5968	67.8512	73.8477	86.0595	88.7762	81.25	91.5879	91.4607	45.4685	85.3515	55.4498	87.4118	81.4503	87.9056	84.6278
Ergasilus caeruleus	0	0	0	0	0	0	0	0.614754	0.46225	1.85567	5.14706	16.3793	24.4755	8.75	1.81219	1.25858	0.168067	0.634921	0	0	0	0	0	0	0	0	0	0	0	0.1002	0	0	0	0	0	0.0512033	0.0368053	0	0	0	0	0
Acartia spp.	0	0	0	0	0	0	0	85.4508	86.7488	72.9897	66.9118	61.2069	0	0	0	0	0	0	0	0	0	0	0	0	0	0	0	0	4.87603	3.00601	0.929368	0.135227	0.138889	0	0	0	0	0	0	0	0	0
Month	April	April	April	April	April	April	April	May	May	May	May	May	May	May	June	June	June	June	June	June	June	April	April	April	April	April	April	April	May	May	May	May	May	May	May	June	June	June	June	June	June	June
Location	Lower	Lower	Middle	Middle	Middle	Upper	Upper	Lower	Lower	Middle	Middle	Middle	Upper	Upper	Lower	Lower	Middle	Middle	Middle	Upper	Upper	Lower	Lower	Middle	Middle	Middle	Upper	Upper	Lower	Lower	Middle	Middle	Middle	Upper	Upper	Lower	Lower	Middle	Middle	Middle	Upper	Upper
Site	7	6	5	4	3	2	1	7	6	5	4	3	2	1	7	6	5	4	3	2	1	7	6	5	4	3	2	1	7	6	5	4	3	2	1	7	6	5	4	3	2	1
Mesh	200	200	200	200	200	200	200	200	200	200	200	200	200	200	200	200	200	200	200	200	200	60	60	60	60	60	60	60	60	60	60	60	60	60	60	60	60	60	60	60	60	60

## Sheet: Salinity
Sample .	Month	Date	Location	Salinity
13ZP033	4	2013-04-11	ALB04	0.04
13ZP034	4	2013-04-11	ALB04	0.04
13ZP035	4	2013-04-11	ALB03	0.04
13ZP036	4	2013-04-11	ALB03	0.04
13ZP037	4	2013-04-11	ALB02	0.04
13ZP038	4	2013-04-11	ALB02	0.04
13ZP039	4	2013-04-11	ALB01	NA
13ZP040	4	2013-04-11	ALB01	NA
13ZP087	5	2013-05-30	ALB07	1.05
13ZP088	5	2013-05-30	ALB07	1.05
13ZP089	5	2013-05-30	ALB06	1.66
13ZP121	6	2013-06-25	ALB07	0.1
13ZP122	6	2013-06-25	ALB07	0.1
13ZP123	6	2013-06-25	ALB06	0.07
13ZP124	6	2013-06-25	ALB06	0.07
13ZP125	6	2013-06-25	ALB05	0.06
13ZP126	6	2013-06-25	ALB05	0.06
13ZP127	6	2013-06-25	ALB04	0.05
13ZP128	6	2013-06-25	ALB04	0.05
13ZP129	6	2013-06-25	ALB03	0.05
13ZP130	6	2013-06-25	ALB03	0.05
13ZP131	6	2013-06-25	ALB02	0.04
13ZP027	4	2013-04-10	ALB07	NA
13ZP028	4	2013-04-10	ALB07	NA
13ZP029	4	2013-04-10	ALB06	0.04
13ZP030	4	2013-04-10	ALB06	0.04
13ZP031	4	2013-04-11	ALB05	0.04
13ZP032	4	2013-04-11	ALB05	0.04
13ZP132	6	2013-06-25	ALB02	0.04
13ZP133	6	2013-06-25	ALB01	0.03
13ZP134	6	2013-06-25	ALB01	0.03
13ZP090	5	2013-05-30	ALB06	1.66
13ZP091	5	2013-05-30	ALB05	0.38
13ZP092	5	2013-05-30	ALB05	0.38
13ZP093	5	2013-05-30	ALB04	0.31
13ZP094	5	2013-05-30	ALB04	0.31
13ZP095	5	2013-05-30	ALB03	0.12
13ZP096	5	2013-05-30	ALB03	0.12
13ZP097	5	2013-05-30	ALB02	0.09
13ZP098	5	2013-05-30	ALB02	0.09
13ZP099	5	2013-05-30	ALB01	0.05
13ZP100	5	2013-05-30	ALB01	0.05
